# Supplementary material for: Efficient enrichment of glycopeptides by supramolecular nanoassemblies that use proximity-assisted covalent binding
Source: Royal Society of Chemistry journal article supplement (doi:10.1039/c9an01113g), 2019-01-01
Supplement: c9an01113g1.pdf [file c9an01113g1.pdf]

**Supporting Information for:**

**Efficient Extraction of Glycopeptides by Supramolecular  
Nanoassemblies that Use Proximity-Assisted Covalent Binding**

Meizhe Wang,<sup>a</sup> Jingjing Gao,<sup>a</sup> Bo Zhao,<sup>a</sup> S. Thayumanavan<sup>\*abc</sup> and Richard W. Vachet<sup>\*abc</sup>

<sup>a</sup>Department of Chemistry, <sup>b</sup>Center for Bioactive Delivery – Institute for Applied Life Sciences,

<sup>c</sup>Molecular and Cellular Biology Program, University of Massachusetts, Amherst, Massachusetts 01003,

United States

Author email address: [thai@chem.umass.edu](mailto:thai@chem.umass.edu), [rwwachet@chem.umass.edu](mailto:rwwachet@chem.umass.edu)

**Polymer synthesis and characterization**

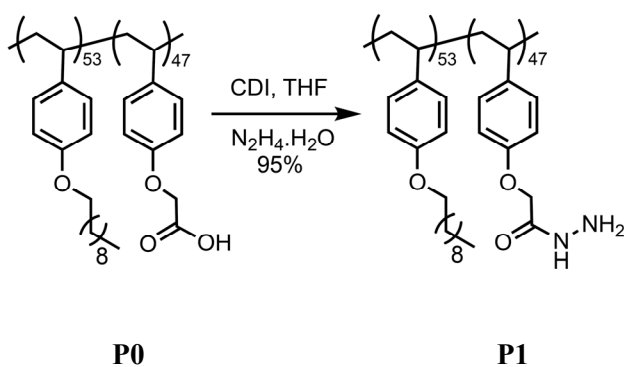

**Scheme S1.** Synthesis of amphiphilic random copolymer **P1**.

**Synthesis of random copolymer P1:** Polymer **P0** was prepared according to previous procedures.<sup>1</sup> **P0** (100 mg) and carbonyldiimidazole (61 mg, 2 equivalents of carboxylate group) were dissolved in 5 mL tetrahydrofuran and stirred at room temperature for 2 hours. Then, this mixture was added to a hydrazine monohydrate/THF (2 mL/2 mL) solution dropwise and allowed to reflux overnight. The solvent was removed by a rotavapor, and the crude oil was purified by precipitating it 3 times in methanol. Yield: 90%, GPC (THF) Mn: 11.5 K. Đ: 1.08. <sup>1</sup>H NMR (400 MHz, CDCl<sub>3</sub>): δ 6.57-6.2, 4.53, 3.89, 1.77, 1.48-1.26, 0.90. <sup>13</sup>C NMR (100 MHz, CDCl<sub>3</sub>) δ 157.1, 128.5, 114.2, 67.9, 31.9, 29.6, 29.3, 29.1, 26.2, 25.5, 22.7, 14.1. From <sup>1</sup>H NMR, integration of the proton peaks at 0.90 ppm and 4.53 ppm confirmed the molar ratio of these two components to be 53:47.

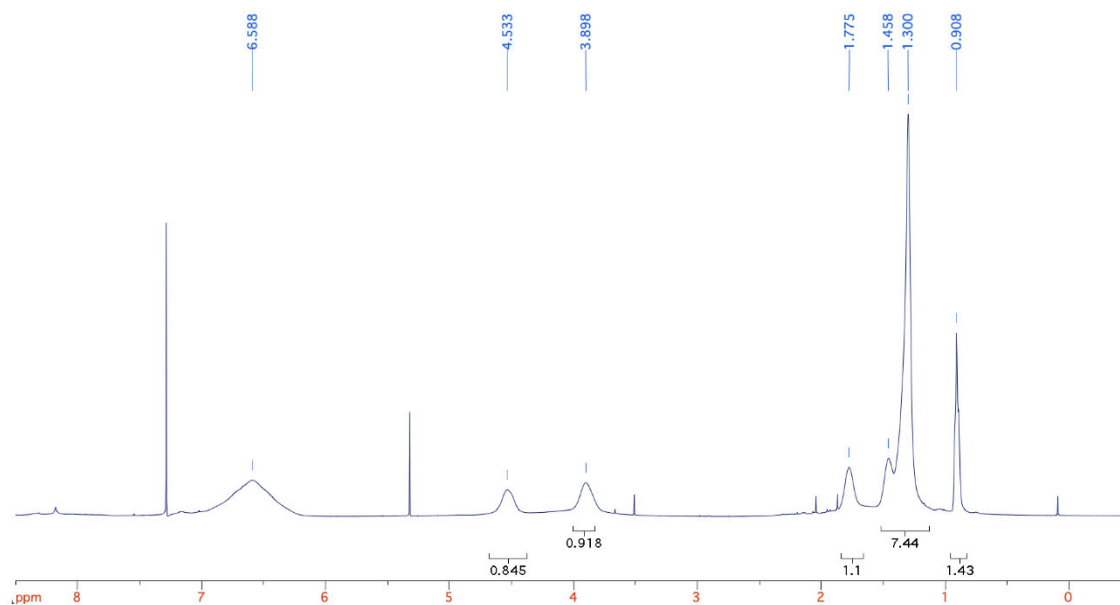

The hydrazide functional group attachment was confirmed by IR (**Figure S1**) showing a broad peak at 3319 cm<sup>-1</sup> corresponding to N-H bond, C=O bond shift from 1731 cm<sup>-1</sup> to 1693 cm<sup>-1</sup> due to the conversion of -OH to -NHNH<sub>2</sub>.

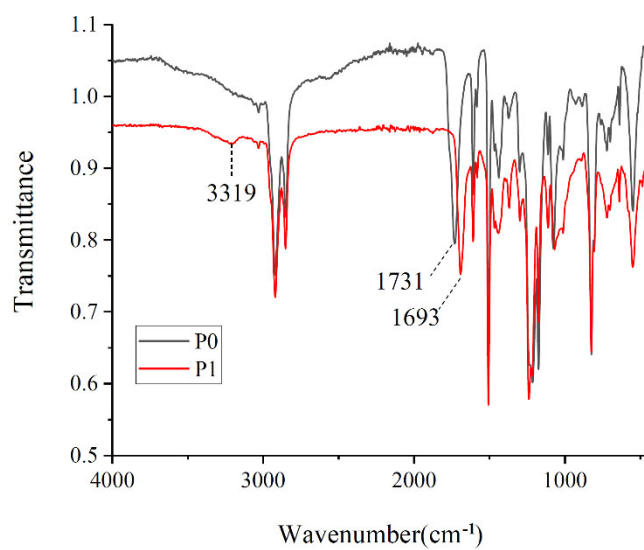

**Figure S1.** FT-IR of polymer carboxylate polymer **P0** and hydrazide polymer **P1**.

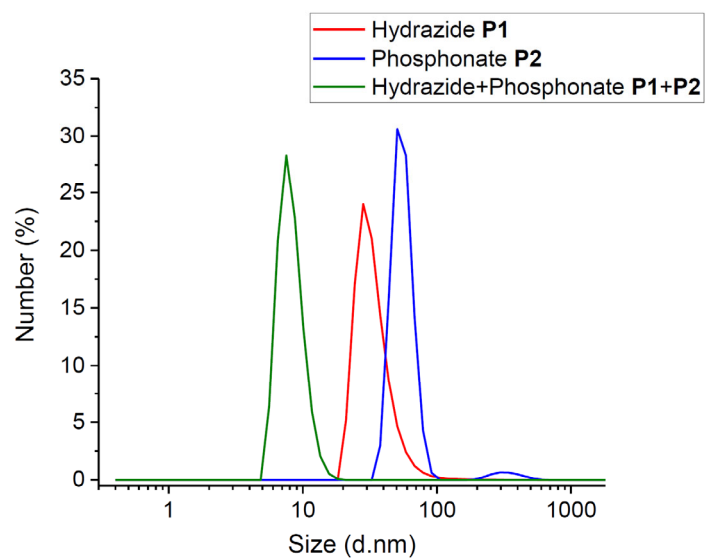

**Figure S2.** Dynamic light scattering data for nanoassemblies formed by polymers **P1**, **P2** and **P1+P2**.

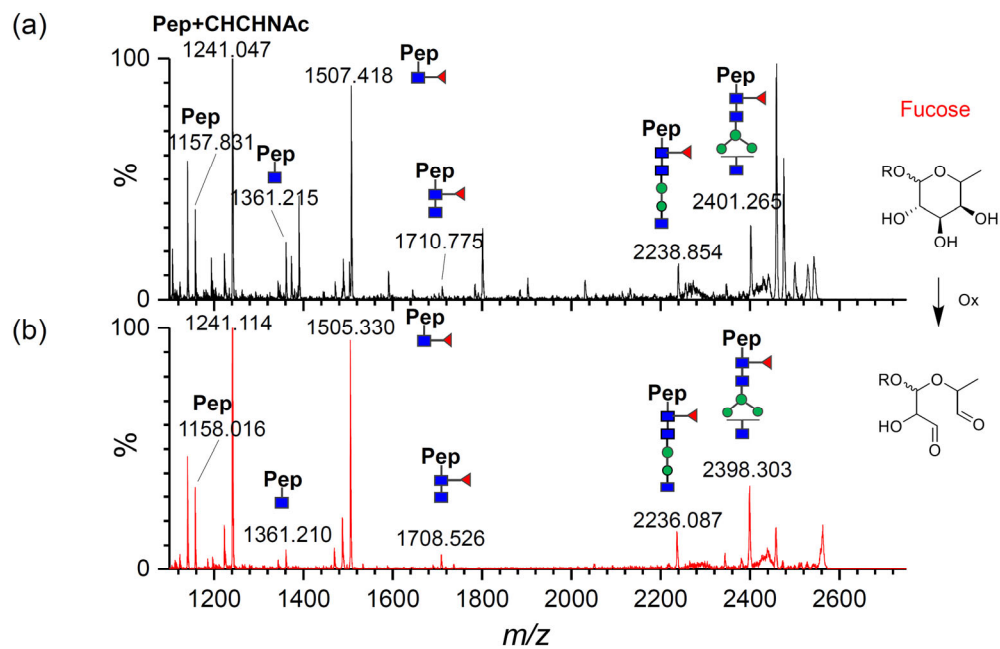

**Figure S3.** Glycopeptide analysis before and after enrichment with polymer **P1**. (a) Tandem mass spectrum of the precursor ion at  $m/z$  2602.1 from the IgG1 digest and (b) Tandem mass spectrum of  $m/z$  2600.4 after oxidation and enrichment (b). Symbol: (■) GlcNAc (●) Mannose (◄) Fucose.

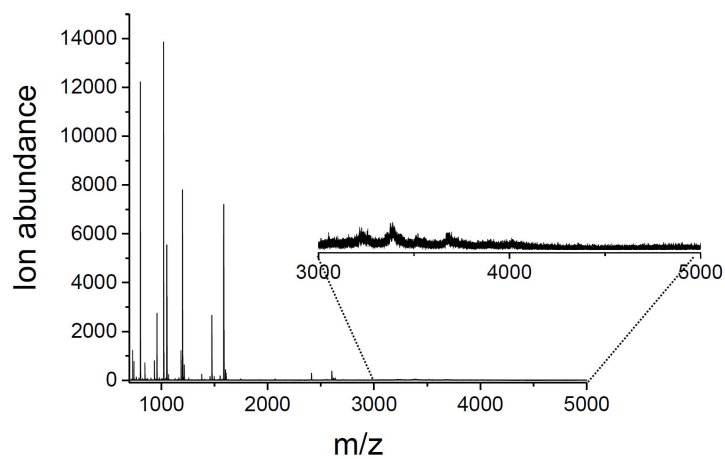

**Figure S4.** MALDI spectrum of oxidized HRP digests before enrichment. No glycopeptides are detected.

#### Reference

- 1 B. Zhao, J. Zhuang, M. A. C. Serrano, R. W. Vachet and S. Thayumanavan, *Macromolecules*, 2017, **50**, 9734–9741.
